# Supplementary material for: Ytterbium–nitrogen co-doped ordered mesoporous TiO2: an innovative hetero-phase photocatalyst for harnessing solar energy in green hydrogen production
Source: Royal Society of Chemistry journal article supplement (doi:10.1039/d3ta07458g), 2024-01-01
Supplement: d3ta07458g1.pdf [file d3ta07458g1.pdf]

## Electronic Supporting Information (ESI)

### Ytterbium-nitrogen co-doped ordered mesoporous TiO<sub>2</sub>: The innovative hetero-phase photocatalyst for harnessing solar energy in green hydrogen production<sup>†</sup>

Sanjeev Gupta,<sup>a</sup> Yeonsu Kwak,<sup>b</sup> Rayappan Pavul Raj,<sup>a,c</sup> and Parasuraman Selvam<sup>\*a,d,e</sup>

<sup>†</sup>*Dedicated to Professor Dr. Dionisios G. Vlachos on the occasion of his 60th birthday*

<sup>a</sup> National Centre for Catalysis Research and Department of Chemistry, Indian Institute of Technology-Madras, Chennai 600 036, India

<sup>b</sup> Department of Chemical and Biomolecular Engineering, University of Delaware, 221, Academy Street, Newark, DE 19716, USA

<sup>c</sup> Department of Chemistry, PSG Institute of Advanced Studies, Coimbatore 641 004, India

<sup>d</sup> Delaware Energy Institute, University of Delaware, 221, Academy Street, Newark, DE 19716, USA

<sup>e</sup> International Research Organization for Advanced Science and Technology, Kumamoto University, Kumamoto 860-8555, Japan

*\*Corresponding Author. Telephone: +91 -44-2257-4235/4200; E-mail: selvam@iitm.ac.in*

#### **This PDF file includes:**

Tables S1-S5

Figures S1-S12

Scheme S1

**Table S1.** Electrochemical data (EIS and MS) of various titania samples.

| Photocatalyst     | $\dagger R_{ct}$<br>( $\Omega$ ) | $\ddagger C_{dl}$<br>( $\mu F$ ) | $\S V_{fb}$<br>(V vs RHE) | $\P N_D$<br>( $cm^{-3}$ ) | $\S V_{fb}^{maj}$<br>(V vs RHE) | $\text{\textdollar} N_D^{maj}$<br>( $cm^{-3}$ ) |
|-------------------|----------------------------------|----------------------------------|---------------------------|---------------------------|---------------------------------|-------------------------------------------------|
| Yb/N-TMF-127(350) | 738                              | 99.7                             | - 0.469                   | $1.32 \times 10^{14}$     | - 0.765                         | $2.36 \times 10^{14}$                           |
| N-TMF-127(350)    | 746                              | 22.9                             | - 0.440                   | $1.81 \times 10^{14}$     | - 0.759                         | $2.15 \times 10^{14}$                           |
| P-25              | 813                              | 12.4                             | - 0.461                   | $1.58 \times 10^{15}$     | - 0.626                         | $2.76 \times 10^{15}$                           |

$\dagger$ Charge transfer resistance;  $\ddagger$ Double layer capacitance ( $- 1/2\pi fZ_{max}$ );  $\S$ Minor flat-band potential;  $\P$  Minor carrier density (donor density);  $\text{\textdollar}$ Major flat- band potential;  $\text{\textdollar}$ Major carrier density (donor density).

**Table S2.** Equivalent circuit fitted data for various titania samples.

| Photocatalyst     | $R_1^\dagger$<br>( $\Omega$ ) | $CPE_1^\ddagger$<br>( $\mu F$ ) | $n$<br>( $0 < n < 1$ ) | $R_2^\S$<br>( $\Omega$ ) | $CPE_2^\ddagger$<br>( $\mu F$ ) | $n$<br>( $0 < n < 1$ ) | $R_3^\S$<br>( $\Omega$ ) | $W^\P$<br>( $S.s^{1/2}$ ) | $^\S\chi^2$ |
|-------------------|-------------------------------|---------------------------------|------------------------|--------------------------|---------------------------------|------------------------|--------------------------|---------------------------|-------------|
| Yb/N-TMF-127(350) | 0.9                           | 31.7                            | 0.9                    | 320                      | 45.6                            | 1                      | 362                      | 0.02                      | 0.000166    |
| N-TMF-127(350)    | 0.8                           | 15.9                            | 0.9                    | 764                      | 0.20                            | 1                      | 1                        | 0.87                      | 0.000648    |
| P-25              | 0.5                           | 0.16                            | 0.9                    | 475                      | 0.20                            | 0.9                    | 342                      | 2.20E+10 <sup>#</sup>     | 0.000237    |

<sup>†</sup> $R_1$  - Solution resistance; <sup>‡</sup>Constant phase element; <sup>§</sup> $R_2$  and  $R_3$  - Charge transfer resistance; <sup>¶</sup> $W$ -Warburg diffusion; <sup>#</sup>This is fitted data value, the high slope value of Nyquist tail which can be seen at low frequency.

**Table S3.** Recent advances in developing low-cost photocatalysts for solar hydrogen generation.

| Photocatalyst                                          | Cocatalyst             | Sacrificial agent     | Light source             | Hydrogen evolution<br>( $mmol\ g^{-1}\ h^{-1}$ ) | Ref.      |
|--------------------------------------------------------|------------------------|-----------------------|--------------------------|--------------------------------------------------|-----------|
| Yb/N-TMF-127(350)                                      | NIL                    | Methanol-water        | Solar Simulator (150 W)  | 1.3                                              | This work |
| Yb/N-TMF-108(350)                                      | NIL                    | Methanol-water        | Solar Simulator (150 W)  | 1.2                                              | This work |
| N-TMF-127(350)                                         | NIL                    | Methanol-water        | Solar Simulator (150 W)  | 1.0                                              | This work |
| N-TMF-108(350)                                         | NIL                    | Methanol-water        | Solar Simulator (150 W)  | 0.9                                              | This work |
| TiO <sub>2</sub> (P-25)                                | NIL                    | Methanol-water        | 150 W Solar Simulator    | 0.4                                              | This work |
| TiO <sub>2</sub>                                       | WSe <sub>2+x</sub>     | Ethanol-water         | 3W-LED (365 nm)          | 3.8                                              | 1         |
| TiO <sub>2</sub>                                       | MoS <sub>2</sub>       | Methanol-water        | 3W-LED (365 nm)          | 2.4                                              | 2         |
| TiO <sub>2</sub>                                       | MoS <sub>2+x</sub>     | Methanol-water        | 3W-LED (365 nm)          | 1.8                                              | 3         |
| TiO <sub>2</sub>                                       | MoC                    | Methanol-water        | 3W-LED (365 nm)          | 0.5                                              | 4         |
| TiO <sub>2</sub>                                       | Fe-Ni                  | Ethanol-water         | Lamp (> 400 nm)          | 0.4                                              | 5         |
| TiO <sub>2</sub>                                       | NiS                    | Methanol              | 350 W Xe lamp            | 0.7                                              | 6         |
| TiO <sub>2</sub>                                       | Ni                     | Triethanolamine-water | UV-Visible lamp          | 1.2                                              | 7         |
| TiO <sub>2</sub>                                       | Au@ReSe <sub>2+x</sub> | Triethanolamine-water | 3W-LED (365 nm)          | 6.0                                              | 8         |
| TiO <sub>2</sub>                                       | NiS <sub>x</sub>       | Methanol-water        | Xe lamp (300 W)          | 1.0                                              | 9         |
| <i>h</i> -TiO <sub>2</sub>                             | CoO                    | Methanol-water        | Xe lamp (300W)           | 2.6                                              | 10        |
| TiO <sub>2</sub>                                       | Cu <sub>x</sub> P      | Methanol-water        | 3W-LED 365 nm            | 1.9                                              | 11        |
| 10Yb10Bi <sub>2</sub> S <sub>3</sub> /TiO <sub>2</sub> | Na <sub>2</sub> S      | Methanol-water        | 1000 W Xenon Lamp        | 0.1                                              | 12        |
| Yb-doped TiO <sub>2</sub>                              | Pt                     | Methanol-water        | 300 W Ultra Vitalux Lamp | 8.4                                              | 13        |
| La-doped TiO <sub>2</sub>                              | Pt                     | Methanol-water        | 300 W Ultra Vitalux Lamp | 7.8                                              | 13        |
| Gd-doped TiO <sub>2</sub>                              | Pt                     | Methanol-water        | 300 W Ultra Vitalux Lamp | 13.2                                             | 13        |

## References

1. D. Gao, W. Zhong, X. Wang, F. Chen and H. Yu, *J. Mater. Chem. A*, 2022, **10**, 7989–7998
2. W. Wang, S. Zhu, Y. Cao, Y. Tao, X. Li, D. Pan, D. L. Phillips, D. Zhang, M. Chen, G. Li and H. Li, *Adv. Funct. Mater.*, 2019, **29**, 1901958.
3. D. Gao, P. Deng, J. Zhang, L. Zhang, X. Wang, H. Yu and J. Yu, *Angew. Chem. Int. Ed.*, 2023, **62**, e202304559.
4. J. Liu, P. Wang, J. Fan and H. Yu, *J. Energy Chem.*, 2020, **51**, 253–261.
5. T. Sun, J. Fan, E. Liu, L. Liu, Y. Wang, H. Dai, Y. Yang, W. Hou, X. Hu and Z. Jiang, *Powder Technol.*, 2012, **228**, 210–218.
6. F. Xu, L. Zhang, B. Cheng and J. Yu, *ACS Sustainable Chem. Eng.*, 2018, **6**, 12291–12298.
7. P. D. Tran, L. Xi, S. K. Batabyal, L. H. Wong, J. Barber and J. S. Chye Loo, *Phys. Chem. Chem. Phys.*, 2012, **14**, 11596–11599.
8. W. Zhong, J. Xu, X. Zhang, J. Zhang, X. Wang and H. Yu, *Adv. Funct. Mater.*, 2023, **33**, 2302325.
9. Y. Wei, G. Cheng, J. Xiong, J. Zhu, Y. Gan, M. Zhang, Z. Li and S. Dou, *J. Energy Chem.*, 2019, **32**, 45–56.
10. X. Chen, B. Sun, J. Chu, Z. Han, Y. Wang, Y. Du, X. Han and P. Xu, *ACS Appl. Mater. Interfaces*, 2022, **14**, 28945–28955.
11. J. Xu, W. Zhong, H. Yu, X. Hong, J. Fan, J. Yu, *J. Mater. Chem. C*, 2020, **8**, 15816–15822.
12. M. Miodyńska, A. Mikołajczyk, B. Bajorowicz, J. Zwara, T. Klimczuk, W. Lisowski, G. Trykowski, H. P. Pinto, and A. Zaleska-Medynska, *App. Catal. B: Environ.*, 2020, **272**, 118962.
13. M. Zalas and M. La, *Solar Energy Mater. Solar Cells*, 2005, **89**, 287.

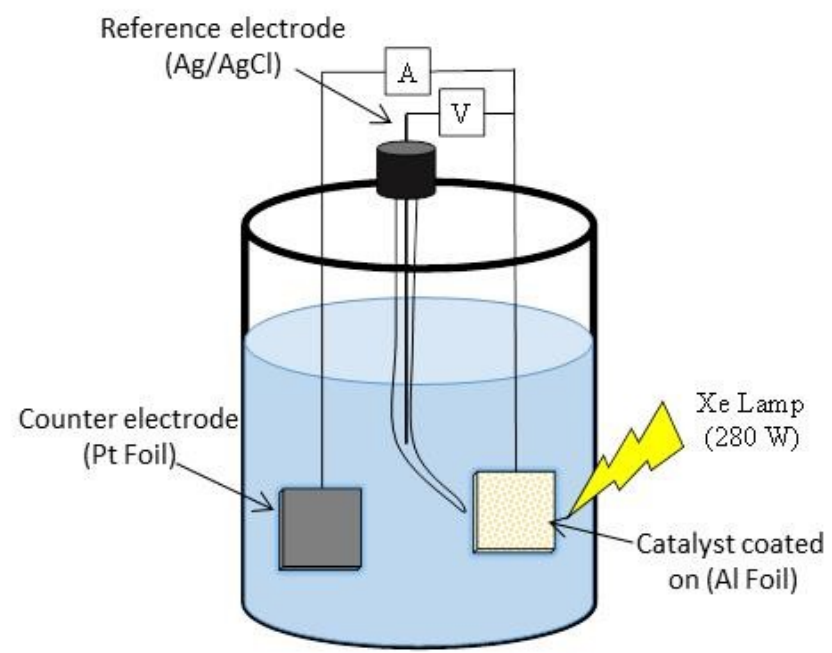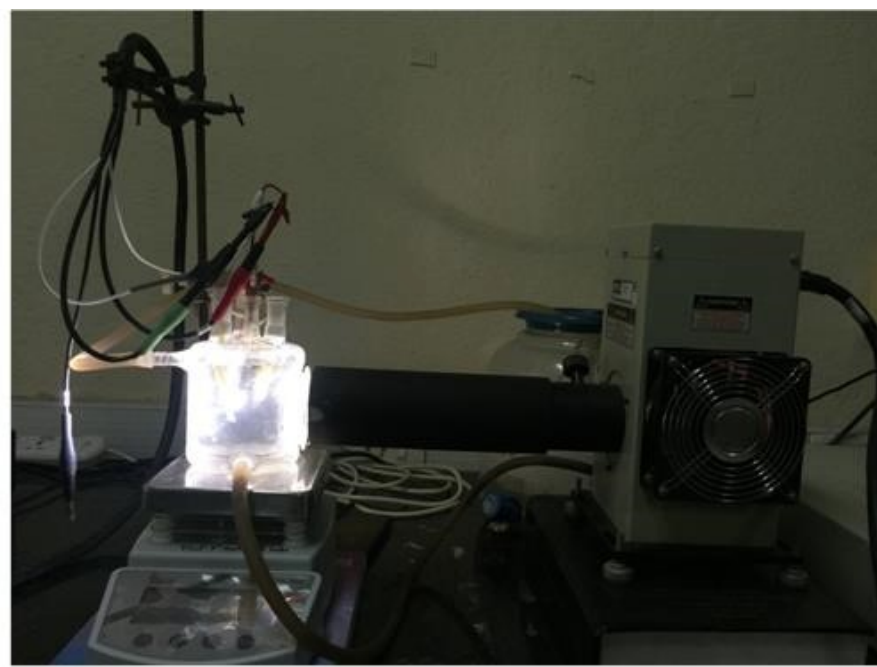

**Figure S1.** Photo-electrochemical reactor set-up: (a) Schematic; (b) Experimental system.

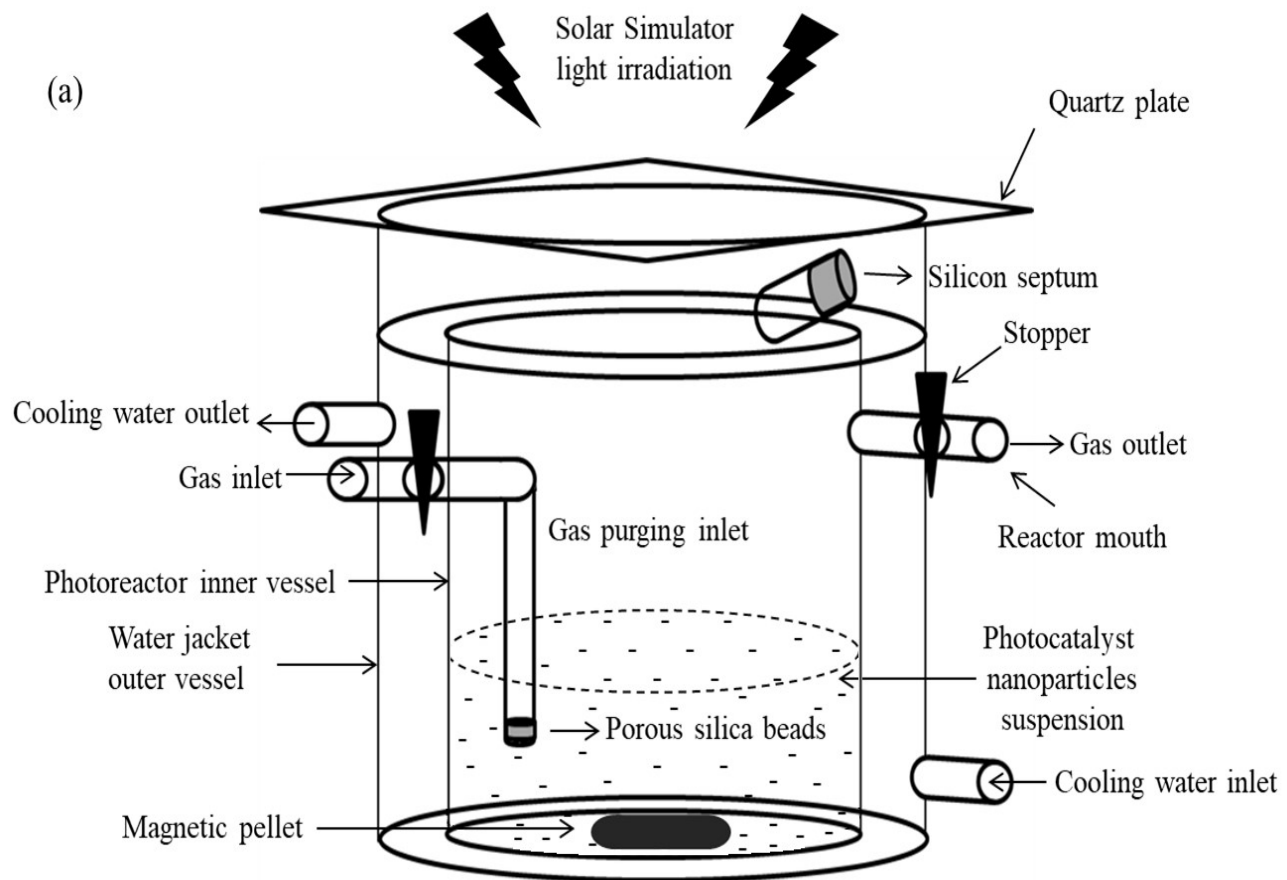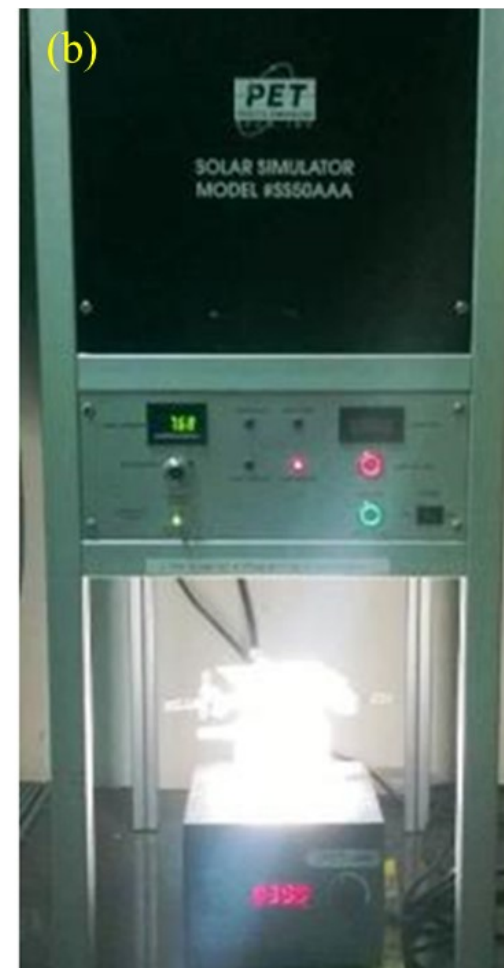

**Figure S2.** (a) A schematic photocatalytic reactor set-up. (b) Photocatalytic reactor system in a solar simulator.

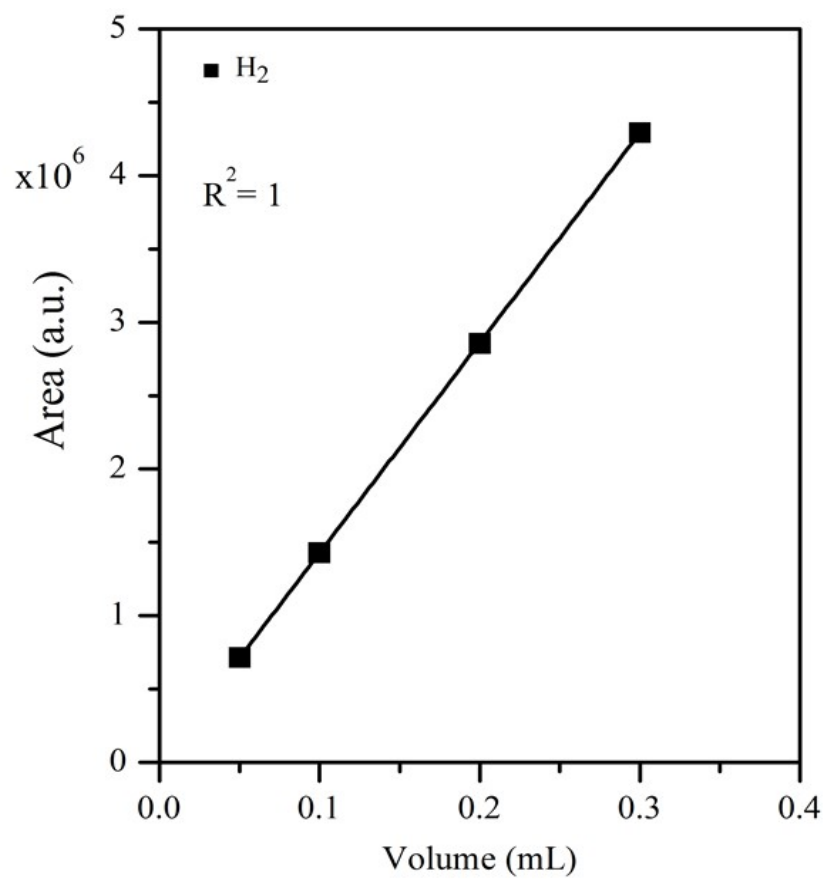

**Figure S3.** Calibration plot of hydrogen for quantitative analysis.



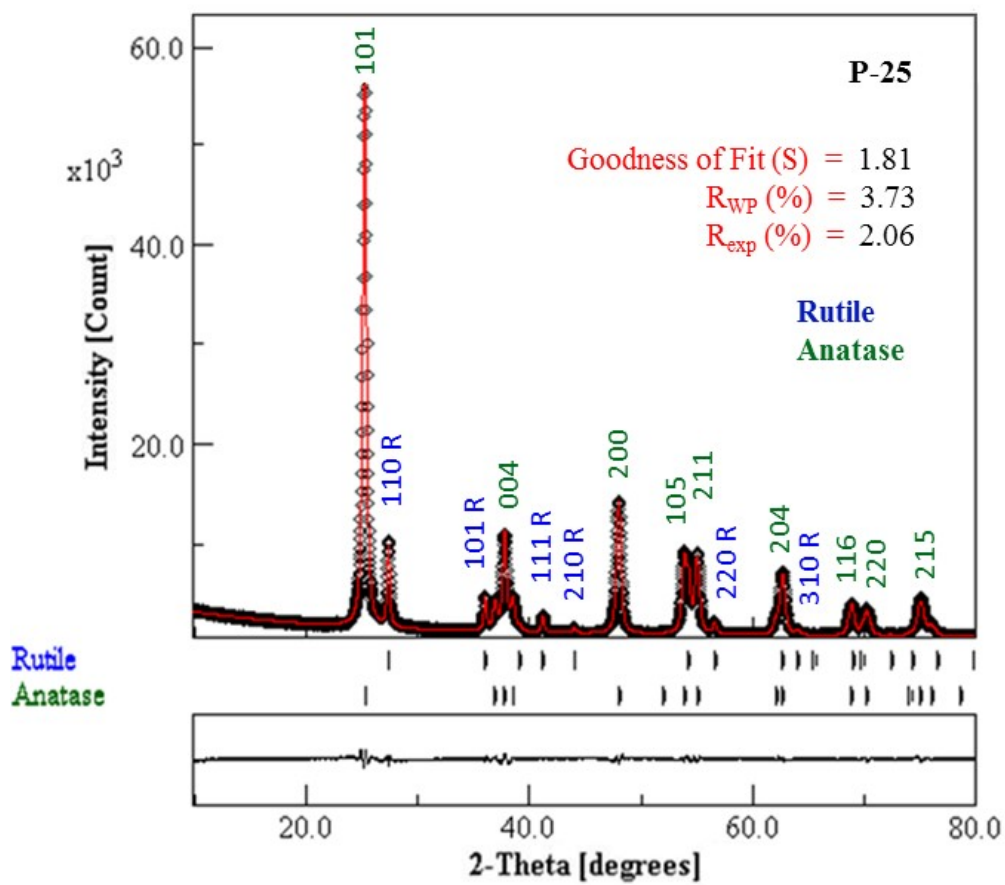

**Figure S4.** The Rietveld refined powder XRD pattern of P-25.

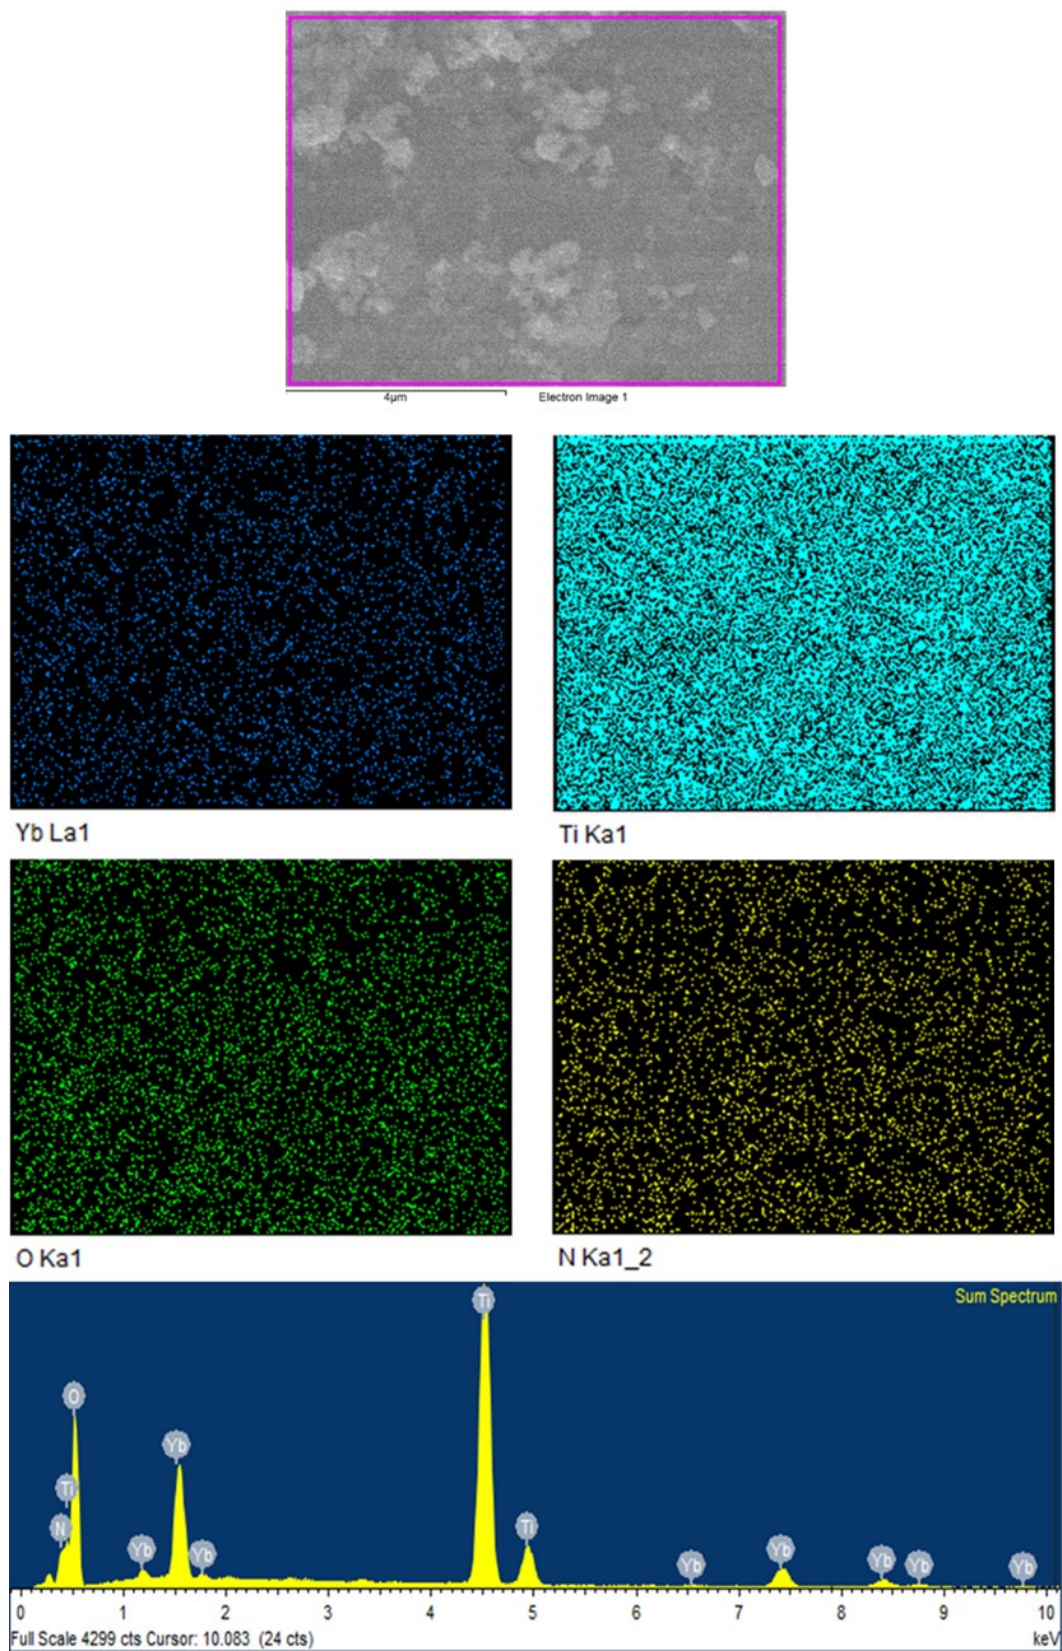

**Figure S5.** SEM image; EDX mapping and EDS spectra of Yb/N-TMF-127(350).

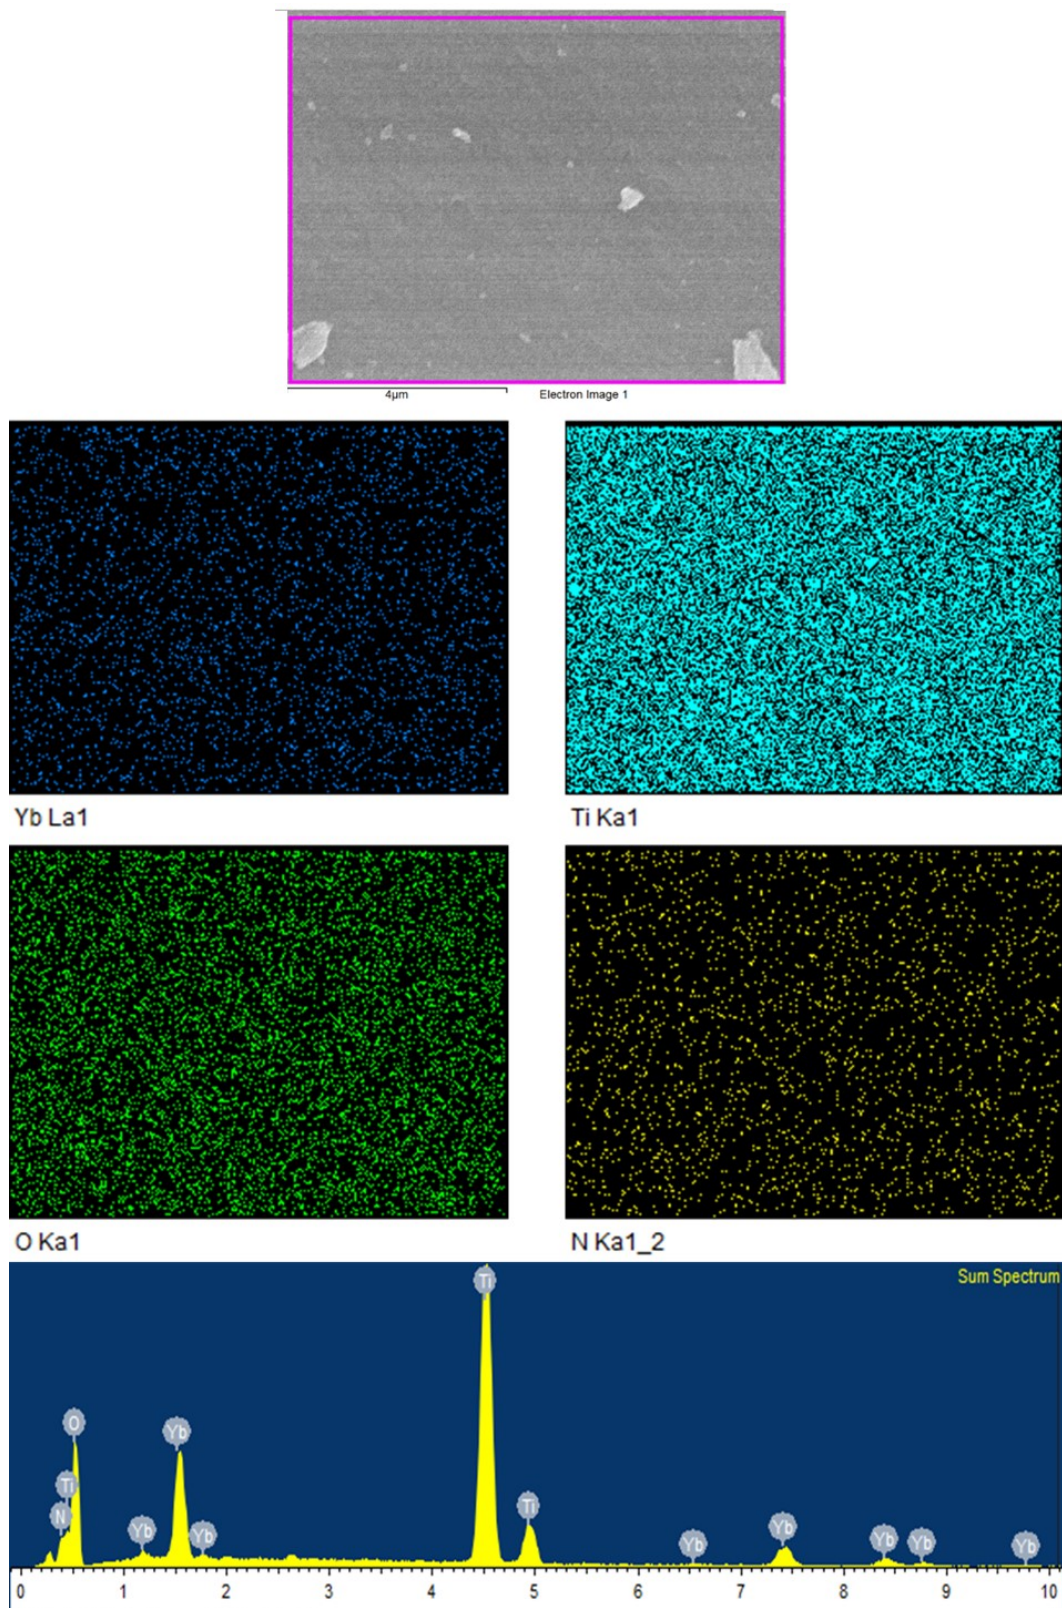

**Figure S6.** SEM image; EDX mapping and EDS spectra of Yb/N-TMF-108 (350).

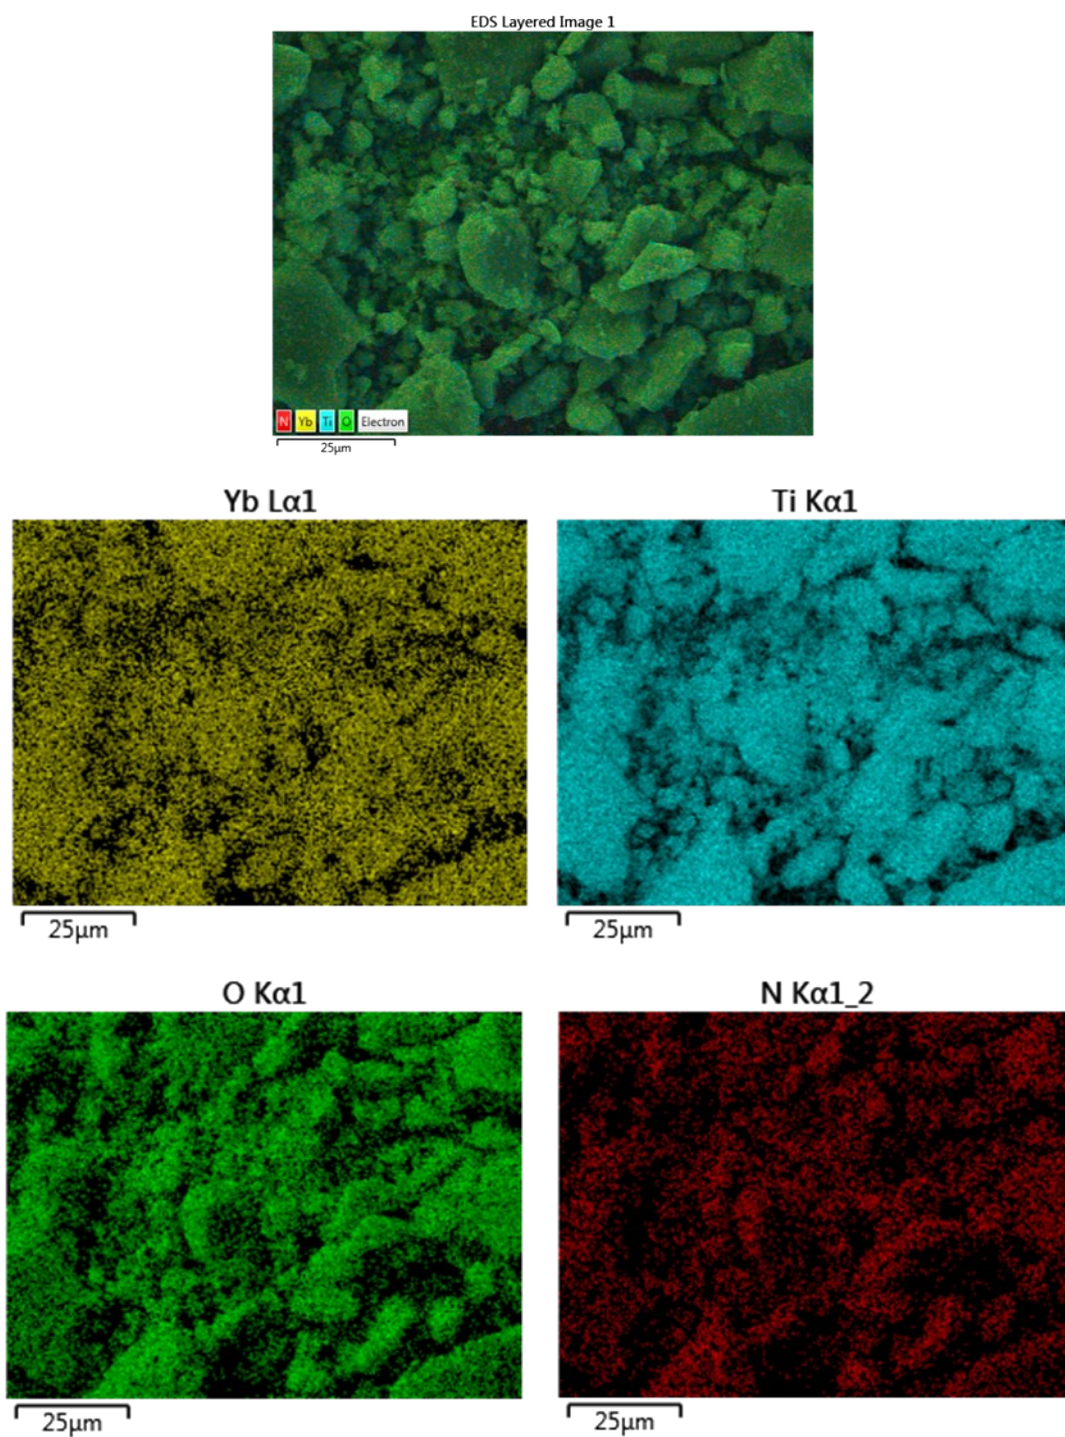

**Figure S7.** SEM image; EDX mapping and EDS spectra of Yb/N-TMF-127 (550).

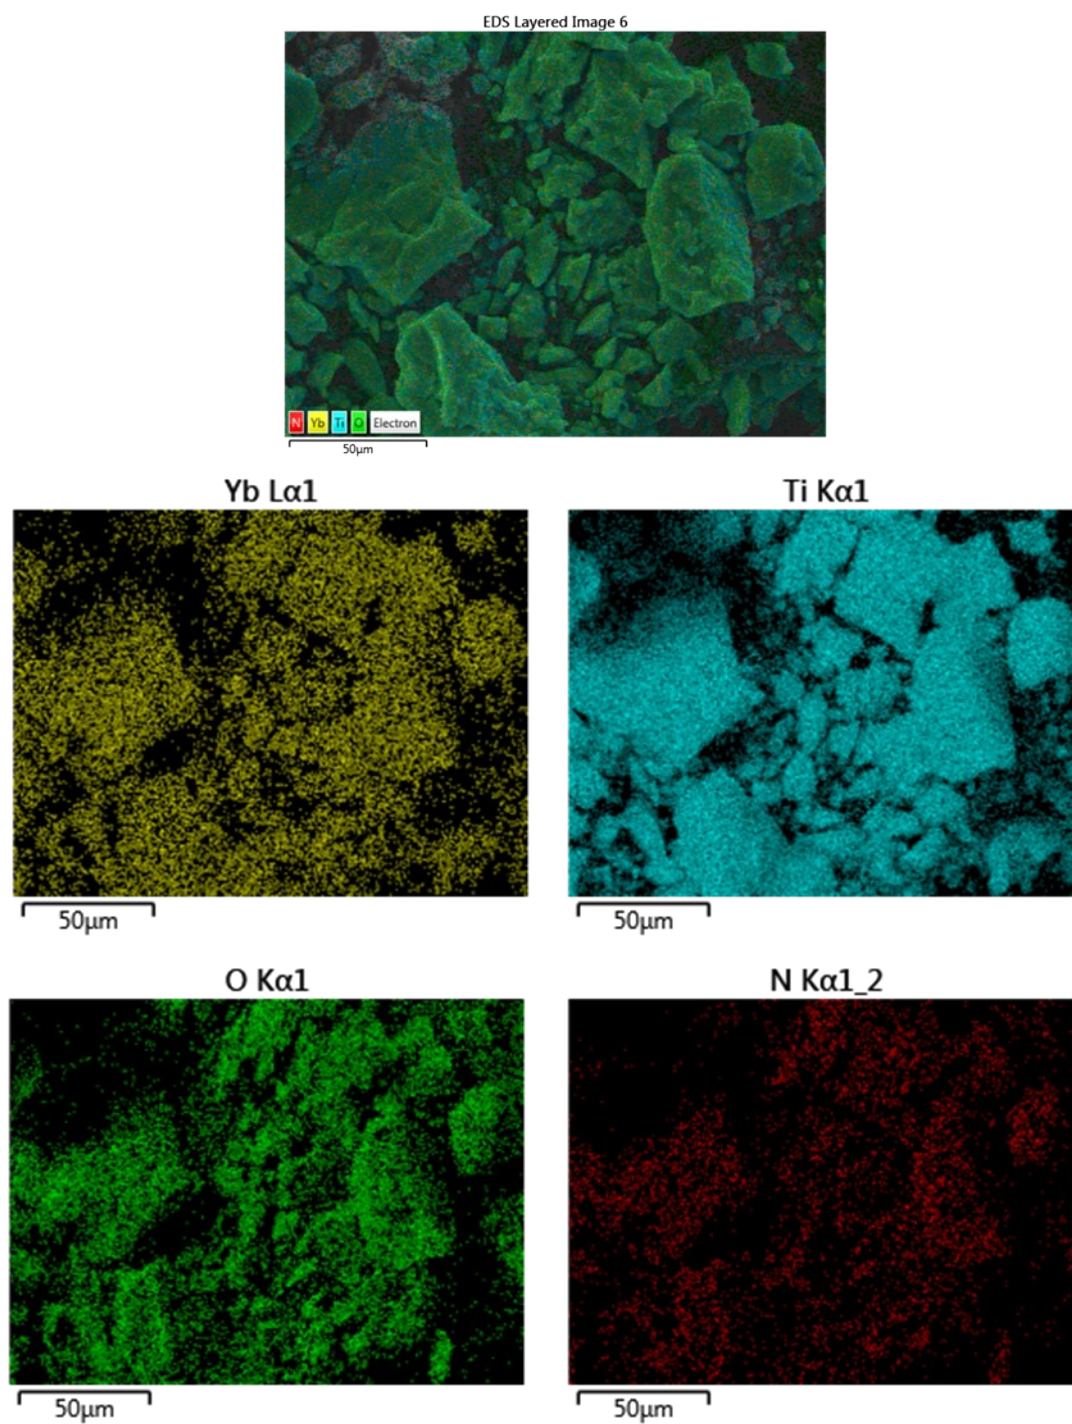

**Figure S8.** SEM image; EDX mapping and EDS spectra of Yb/N-TMF-108 (650).

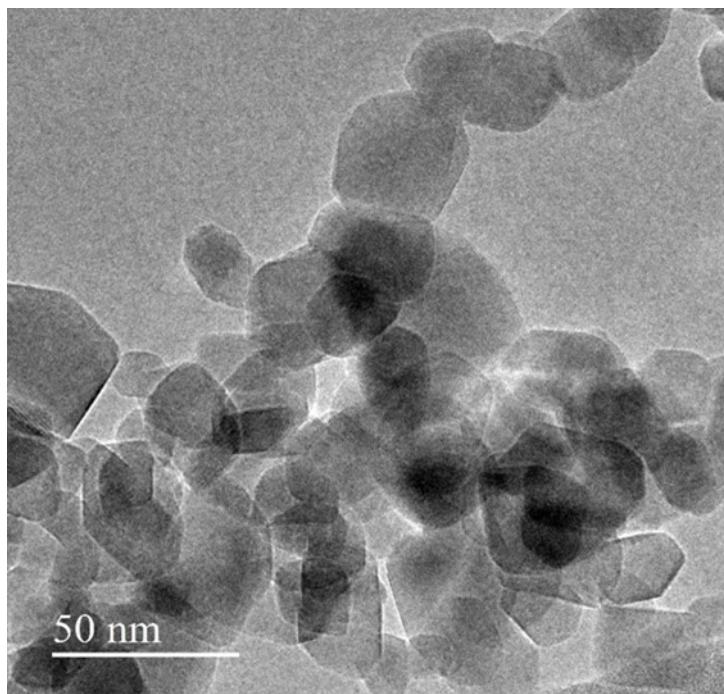

**Figure S9.** TEM image of TiO<sub>2</sub> (P-25) catalyst.

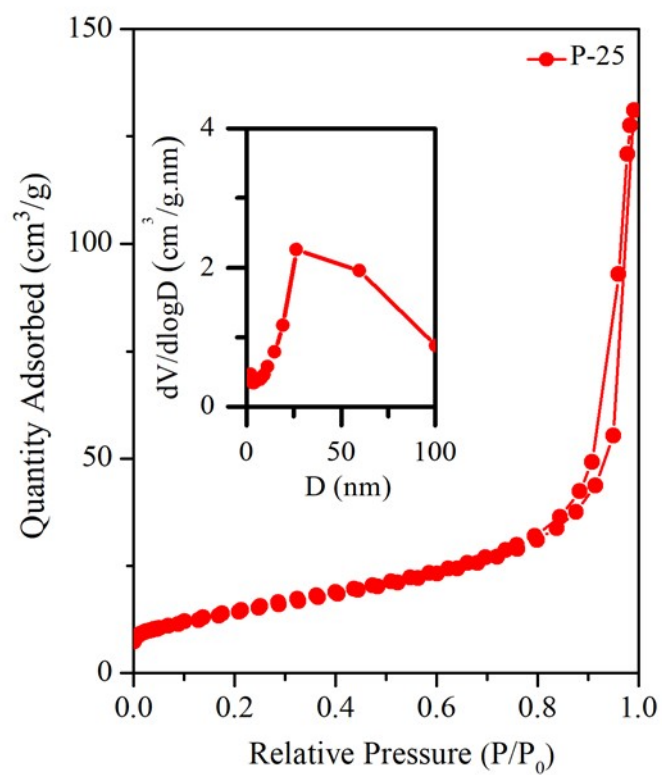

**Figure S10.** Nitrogen sorption isotherm of P-25

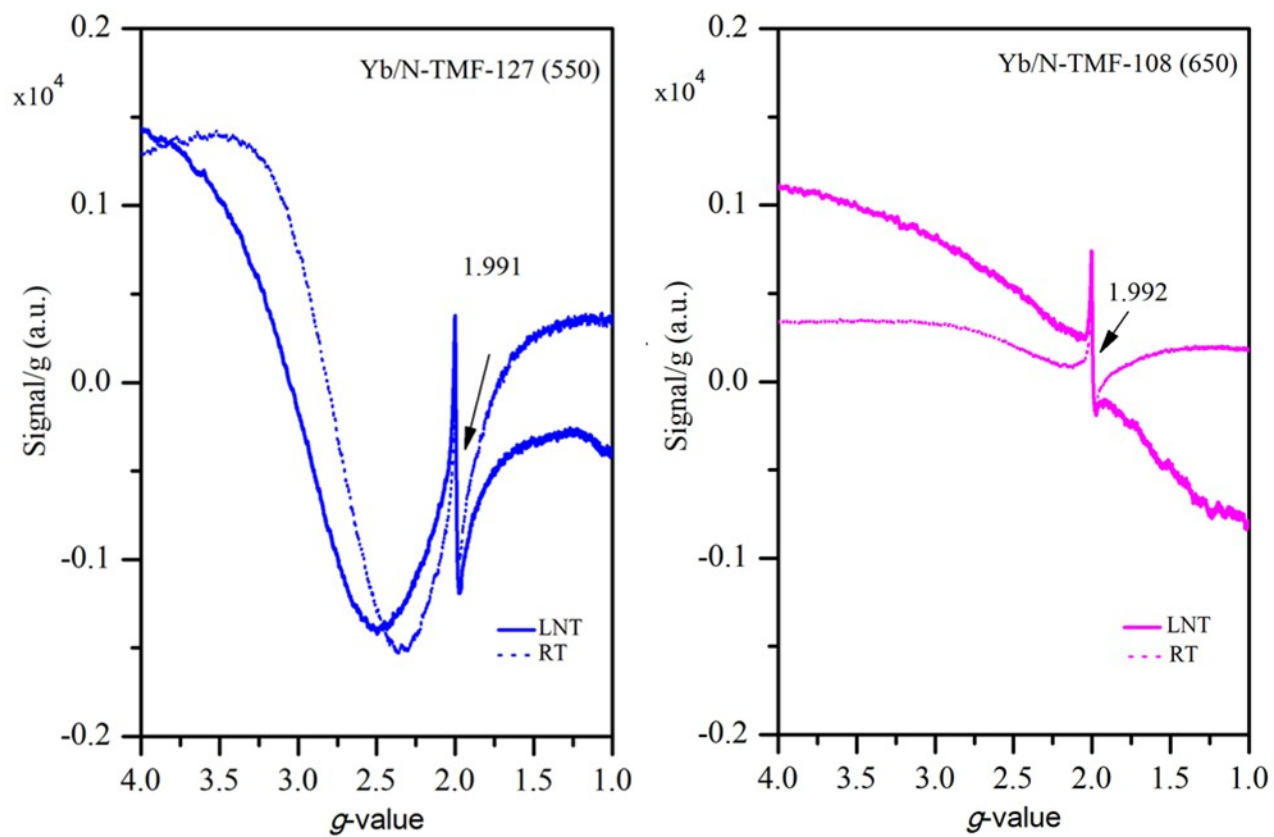

**Figure S11.** EPR spectra of Yb/N-OMT.



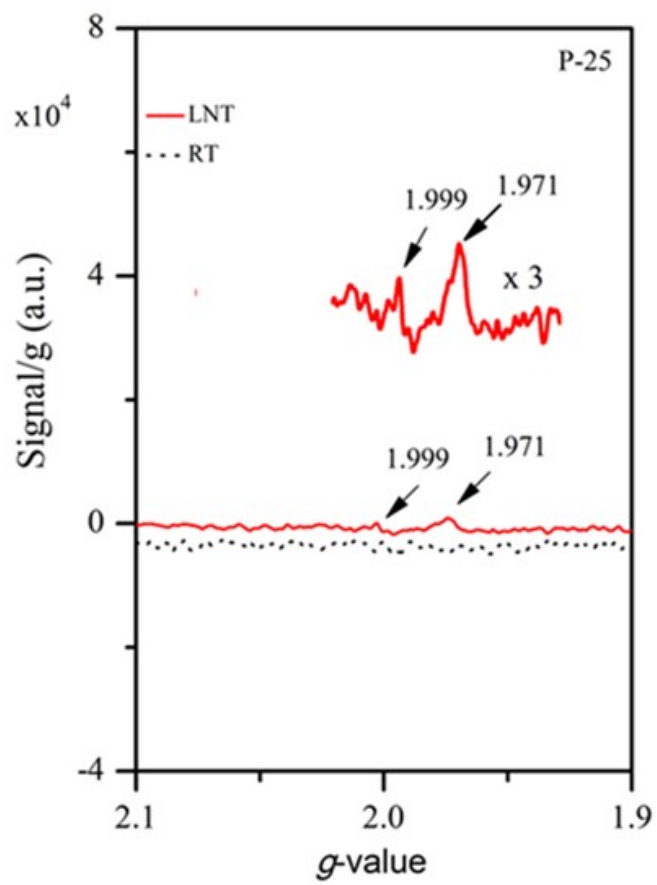

**Figure S12.** EPR spectra of P-25.
